# Supplementary material for: Description of the Human Atrial Action Potential Derived From a Single, Congruent Data Source: Novel Computational Models for Integrated Experimental-Numerical Study of Atrial Arrhythmia Mechanisms
Source: PubMed Central journal article supplement (PMC6137999; doi:10.3389/fphys.2018.01211), 2018-09-07
Supplement: Data_Sheet_1.pdf [file Data_Sheet_1.pdf]

## *Supplementary Material*

### **Description of the human atrial action potential derived from a single, congruent data source: Novel computational models for integrated experimental-numerical study of atrial arrhythmia mechanisms**

Michael A. Colman\*, Priyanka Saxena, Sarah Kettlewell, Antony J. Workman

\* Correspondence: [m.a.colman@leeds.ac.uk](mailto:m.a.colman@leeds.ac.uk)

#### Contents

|     |                                                        |   |
|-----|--------------------------------------------------------|---|
| 1   | Novel current formulations .....                       | 2 |
| 1.1 | Time independent potassium current, $I_{K1}$ .....     | 2 |
| 1.2 | Rapid potassium currents, $I_{to}$ and $I_{sus}$ ..... | 2 |
| 1.3 | L-type calcium current, $I_{CaL}$ .....                | 3 |
| 1.4 | Fast-sodium current, $I_{Na}$ .....                    | 3 |
| 2   | Implementation with cell models .....                  | 5 |
| 2.1 | The minimal, Workman-lab models .....                  | 5 |
| 2.2 | Modified cell models .....                             | 5 |
| 3   | Parameters .....                                       | 6 |
| 4   | References .....                                       | 6 |

## 1 Novel current formulations

### 1.1 Time independent potassium current, $I_{K1}$

Due to the importance of the form of the current in the voltage range -80mV - -40 mV, where the current may be very small, polynomials were used to achieve a precise fit to the complex voltage dependence of the current:

$$I_{K1}^{isolated} = 4(0.096 + 7.12 \times 10^{-3} V_m + 8.95 \times 10^{-5} V_m^2 - 7.13 \times 10^{-8} V_m^3 - 1.35 \times 10^{-9} V_m^4) \quad (1)$$

$$I_{K1}^{intact} = 4(0.0029 + 1.29 \times 10^{-3} V_m + 3.51 \times 10^{-5} V_m^2 - 9.76 \times 10^{-8} V_m^3 - 1.35 \times 10^{-9} V_m^4) \quad (2)$$

### 1.2 Rapid potassium currents, $I_{to}$ and $I_{sus}$

$$I_{to} = g_{to} \cdot va_{Ito} \cdot \left( (1 - F_S) vi_{Ito\_1} + F_S vi_{Ito\_2} \right) \cdot (V_m - E_K) \quad (3)$$

$$I_{sus} = g_{sus} \cdot va_{Isus} \cdot vi_{Isus} \cdot (V_m - E_K) \quad (4)$$

Where the dynamics of the gating variables ( $va_{ito/sus}$ ,  $vi_{ito/sus}$ ) are described by the general differential equation:

$$dx/dt = (x_{ss} - x) / x_\tau \quad (5)$$

With steady-states:

$$va_{Ito\_ss} = 1 / \left( 1 + e^{-(V_m - 15)/7} \right) \quad (6)$$

$$vi_{Ito\_1\_ss} = 1 / \left( 1 + e^{(V_m - (-23))/5.3} \right) \quad (7)$$

$$vi_{Ito\_2\_ss} = vi_{Ito\_1\_ss} \quad (8)$$

$$va_{Isus\_ss} = 1 / \left( 1 + e^{(V_m - (-4.25))/5.61} \right) \cdot 4.15 \cdot e^{0.183V_m - 0.9849} \quad (9)$$

$$vi_{Isus\_ss} = 1 / \left( 1 + e^{(V_m - (-7.5))/10} \right) \quad (10)$$

And time constants:

$$va_{Ito\_tau} = 0.4 + 18e^{-\left(\frac{V_m + 40}{45}\right)^2} \quad (11)$$

$$vi_{Ito\_1\_tau} = 8.6 + 62e^{-\left(\frac{V_m + 32}{27}\right)^2} \quad (12)$$

$$vi_{Ito\_2\_tau} = 15 + 29.73 / \left( 1 + e^{0.0696(V_m - 2.72)} \right) \quad (13)$$

$$va_{I_{sus\_}\tau} = 0.5 + 0.9 / (1 + e^{(V_m+5)/12}) \quad (14)$$

$$vi_{I_{sus\_}\tau} = 3000 + 590 / (1 + e^{(V_m+60)/10}) \quad (15)$$

And proportion of fast/slow channels given by:

$$F_s = 0.2 / (1 + e^{-(V-35)/5}) \quad (16)$$

### 1.3 L-type calcium current, $I_{CaL}$

The novel formulation presented has the following form:

$$I_{CaL} = p_{CaL} \cdot va_{ICaL} \cdot (0.8vi_{ICaL\_1} + 0.2vi_{ICaL\_2}) \cdot ci_{ICaL} \cdot \bar{I}_{CaL,Ca} \quad (17)$$

Voltage-dependent gates:

$$va_{ICaL\_ss} = 1 / (1 + e^{-(V_m-0.5)/5.967}) \quad (18)$$

$$vi_{ICaL\_1\_ss} = 1 / (1 + e^{(V_m-(-18))/3.8}) \quad (19)$$

$$vi_{ICaL\_2\_ss} = vi_{ICaL\_1\_ss} \quad (20)$$

$$va_{ICaL\_}\tau = 7.02 - 2.37e^{-((V_m-14.45)/52.33)^2} \quad (21)$$

$$vi_{ICaL\_1\_}\tau = 16.48 - 10.72e^{-((V_m-(-2.22))/22.64)^2} \quad (22)$$

$$vi_{ICaL\_2\_}\tau = 12424 - 12027e^{-((V_m-13)/83)^2} \quad (23)$$

Where  $I_{CaL,Ca\_bar}$  was modelled as presented in Grandi et al. 2011. Calcium inactivation was modelled as in the baseline  $Ca^{2+}$ -handling system, with the following modifications for the WL models (not the modified models, which retain calcium-inactivation as originally presented):

$$ci_{ICaL\_}\tau = 50.0 \quad \} CRN \quad (24)$$

$$\left. \begin{aligned} ci_{ICaL\_}\alpha &= 5.1 \\ ci_{ICaL\_}\beta &= 8.33 \times 10^{-3} \end{aligned} \right\} GB \quad (25)$$

### 1.4 Fast-sodium current, $I_{Na}$

$$I_{Na} = g_{Na} \cdot va_{INa}^3 \cdot vi_{INa\_1} \cdot vi_{INa\_2} \cdot (V_m - E_{Na}) \quad (26)$$

$$va_{INa\_}\alpha = 0.32(V_m + 39.13) / (1 + e^{-0.09(V_m+39.13)}) \quad (27)$$

$$va_{INa\_}\beta = 0.08e^{-(V_m-8)/11.0} \quad (28)$$

If  $V_m < -40$  mV:

$$vi_{INa\_1\_α} = 0.135e^{-(V_m+85)/6.8} \quad (29)$$

$$vi_{INa\_1\_β} = 3.285e^{0.079(V_m+5)} + 31000e^{0.35(V_m+5)} \quad (30)$$

$$vi_{INa\_2\_α} = \left( -127140e^{0.24444(V_m+5)} - 3.474 \times 10^{-5} e^{-0.04391(V_m+5)} \right) \left( \frac{V_m + 42.78}{1 + e^{0.3111(V_m+84.23)}} \right) \quad (31)$$

$$vi_{INa\_2\_β} = 0.10908e^{-0.01052(V_m+5)} / \left( 1 + e^{-0.1378(V_m+45.14)} \right) \quad (32)$$

Else:

$$vi_{INa\_1\_α} = 0 \quad (33)$$

$$vi_{INa\_1\_β} = 1 / \left( 0.13(1 + e^{-(V_m+15.86)/11.1}) \right) \quad (34)$$

$$vi_{INa\_2\_α} = 0 \quad (35)$$

$$va_{INa\_2\_β} = 0.3e^{2.535 \times 10^{-7}(V_m+5)} / \left( 1 + e^{-0.1(V_m+37)} \right) \quad (36)$$

And the steady state and time constant for each gate defined by:

$$v_{x\_ss} = v_{x\_α} / (v_{x\_α} + v_{x\_β}) \quad (37)$$

$$v_{x\_τ} = 1 / (v_{x\_α} + v_{x\_β}) \quad (38)$$

## 2 Implementation with cell models

### 2.1 The minimal, Workman-lab models

The WL model integrated with the CRN[1] ( $WL_{CRN}$ ) retained the additional components ( $I_{NaCa}$ ,  $I_{NaK}$ ,  $I_{CaP}$ ,  $I_{Cab}$ ) and background currents ( $I_{Nab}$ ) as presented in the original study without modification. Implementation with the Grandi et al. 2011 model [2] ( $WL_{GB}$ ) includes these components as well as the additional inclusion of  $I_{Kb}$ ,  $I_{ClCa}$ ,  $I_{Clb}$  from the inherited model. The conductance of these additional currents was reduced in the isolated cell model ( $g_{Kb} \times 0.2$ ,  $g_{ClCa}$ ,  $g_{Clb} \times 0.5$  – isolated cell variants only). Furthermore, integration with the Grandi calcium handling system required modifications to maintain calcium homeostasis: the maximal flux rates for the following parameters were adjusted:  $J_{leak}$  and  $I_{CaP} \times 0.3$ ;  $I_{NCX} \times 0.64$ . This was performed for both the novel and modified cell models, isolated- and intact- environments.

### 2.2 Modified cell models

The modified cell models for the CRN, Grandi and Nygren et al. [3] were created by replacing  $I_{Na}$ ,  $I_{to}$ ,  $I_{sus}$ ,  $I_{K1}$  with the novel formulations, and modifying the steady states of the voltage dependence of  $I_{CaL}$  to fit the experimental IV relationship and current magnitude of the WL data. The modifications were as follows:

CRN model: 3 mV positive shift in voltage dependence of all functions; gradient parameter of activation gate changed from 7.45 to 7.07; increase in current conductance of 1.725.

Grandi model: 10 mV positive shift in the voltage dependence of all functions; gradient parameter of activation gate changed from 7.2 to 6.84; decrease in current conductance of 0.9.

Nygren model: 4 mV positive shift in the voltage dependence of all functions; gradient parameter of activation gate changed from 5.8 to 6.44; increase in current conductance of 1.28. To maintain calcium homeostasis, it was also necessary to increase  $I_{CaP}$  ( $\times 1.5$ ) and  $I_{Kr}/I_{Ks}$  ( $\times 5$ ) and decrease  $I_{Cab}$  ( $\times 0.3$ ) in the intact variant.

### 3 Parameters

| Symbol        | Parameter                                      | Value                |
|---------------|------------------------------------------------|----------------------|
| $[K^+]_o$     | External potassium concentration (mM)          | 4                    |
| $[Na^+]_o$    | External sodium concentration (mM)             | 140                  |
| $[Ca^{2+}]_o$ | External calcium concentration (mM)            | 1.8                  |
| $g_{Na}$      | Maximal conductance $I_{Na}$ (nS/pF)           | 17.55                |
| $g_{to}$      | Maximal conductance $I_{to}$ (nS/pF)           | 0.1028               |
| $g_{sus}$     | Maximal conductance $I_{sus}$ (nS/pF)          | 0.0676               |
| $p_{CaL}$     | Maximal flux rate $I_{CaL}$ (cm/s) – hAM_WLCRN | $5.3 \times 10^{-4}$ |
| $p_{CaL}$     | Maximal flux rate $I_{CaL}$ (cm/s) – hAM_WLGB  | $6.4 \times 10^{-4}$ |

C/C++ code available from [https://github.com/michaelcolman/hAM\\_WL\\_model](https://github.com/michaelcolman/hAM_WL_model) and <http://physicsoftheheart.com/>.

### 4 References

1. Courtemanche M, Ramirez RJ, Nattel S. Ionic mechanisms underlying human atrial action potential properties: insights from a mathematical model. *Am J Physiol.* 1998 Jul;275(1 Pt 2):H301-321.
2. Grandi E, Pandit SV, Voigt N, Workman AJ, Dobrev D, Jalife J, et al. Human Atrial Action Potential and Ca<sup>2+</sup> Model: Sinus Rhythm and Chronic Atrial Fibrillation. *Circ Res.* 2011 Oct 14;109(9):1055–66.
3. Nygren A, Fiset C, Firek L, Clark JW, Lindblad DS, Clark RB, et al. Mathematical Model of an Adult Human Atrial Cell: The Role of K<sup>+</sup> Currents in Repolarization. *Circ Res.* 1998 Jan 23;82(1):63–81.
